# Supplementary material
Source: PubMed Central journal article supplement (PMC3756663)
Supplement: NIHMS456184-supplement-supplement_1.pdf [file NIHMS456184-supplement-supplement_1.pdf]

## SUPPLEMENTAL FIGURE 1

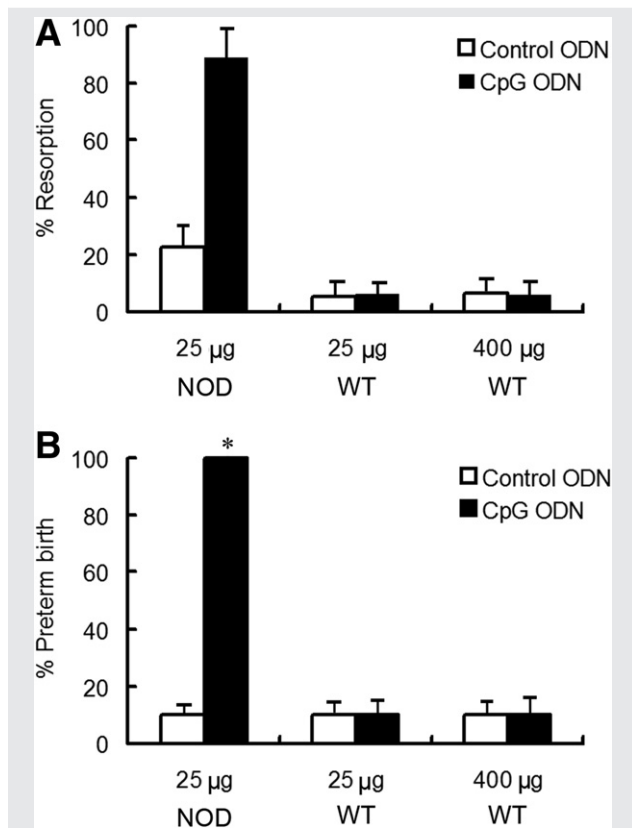

CpG-mediated induction of fetal resorption and preterm birth in WT and NOD mice. CpG or control ODN was injected IP as indicated. (A) Mice were injected with CpG or control ODN at E6.5, and fetal resorption was assessed at E9.5. (B) Injection was performed at E14.5, and the preterm birth rate was assessed. Pup delivery before E18.5 was defined as preterm birth. \*Maximum preterm birth (100%) was observed at the dose of CpG used in the experiments. Ten female mice were used in each group.

*Sun. TLR9 signaling and pregnancy loss. Fertil Steril 2013.*

## SUPPLEMENTAL FIGURE 2

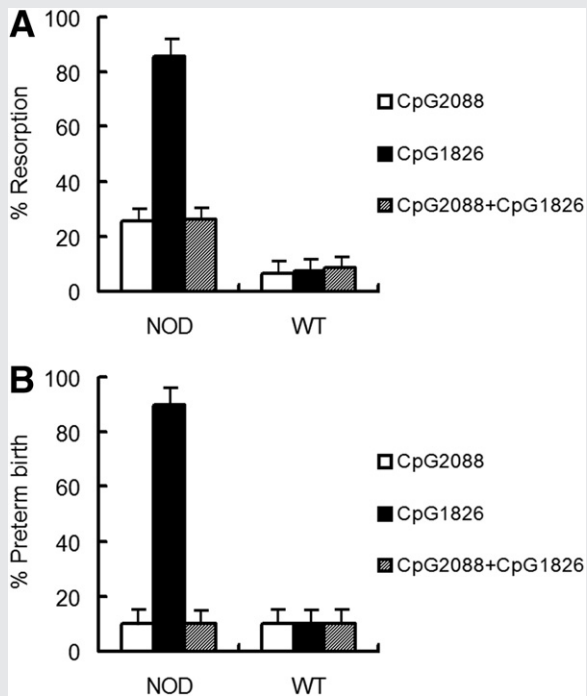

CpG ODN-mediated fetal resorption in NOD mice is TLR9 dependent. (A) Mice were injected with CpG ODN 1826 alone at 25  $\mu$ g/dam, or CpG ODN 2088 alone at 100  $\mu$ g/dam, or CpG 1826 (25  $\mu$ g) plus CpG 2088 (100  $\mu$ g) at E6.5. Fetal resorption was assessed at E9.5. (B) Injection was performed at E14.5, and preterm birth rate was assessed. Pup delivery before E18.5 was defined as preterm birth; n = 10 for each group.

Sun. TLR9 signaling and pregnancy loss. *Fertil Steril* 2013.

## SUPPLEMENTAL FIGURE 3

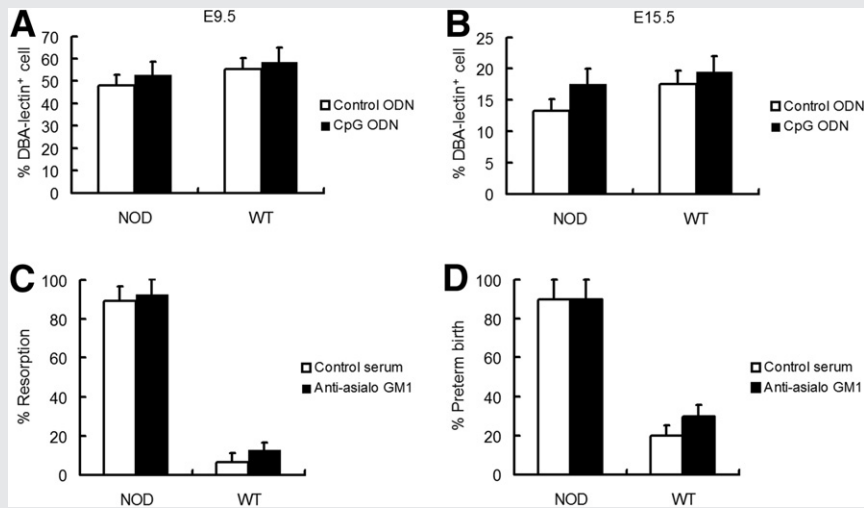

The proportion of uNK cell populations does not change upon CpG ODN stimulation in NOD mice. (A) Mice were injected with CpG 1826 at 25  $\mu\text{g}/\text{dam}$  at E6.5, and the proportion of uNK cells (DBA-lectin<sup>+</sup>) in CD45<sup>+</sup> mononuclear and granular cells was analyzed at E9.5 using flow cytometry. (B) Injection was performed at E14.5, and the proportion of uNK cells (DBA-lectin<sup>+</sup>) in CD45<sup>+</sup> mononuclear and granular cells was analyzed at E15.5 using flow cytometry. (C) In CpG-treated mice, the effect of anti-asialo GM1 on fetal resorption was assessed at E9.5. (D) In CpG-treated mice, the effect of anti-asialo GM1 on preterm birth was assessed. Pup delivery before E18.5 was defined as preterm birth;  $n = 10$  for each group.

*Sun. TLR9 signaling and pregnancy loss. Fertil Steril 2013.*

## SUPPLEMENTAL FIGURE 4

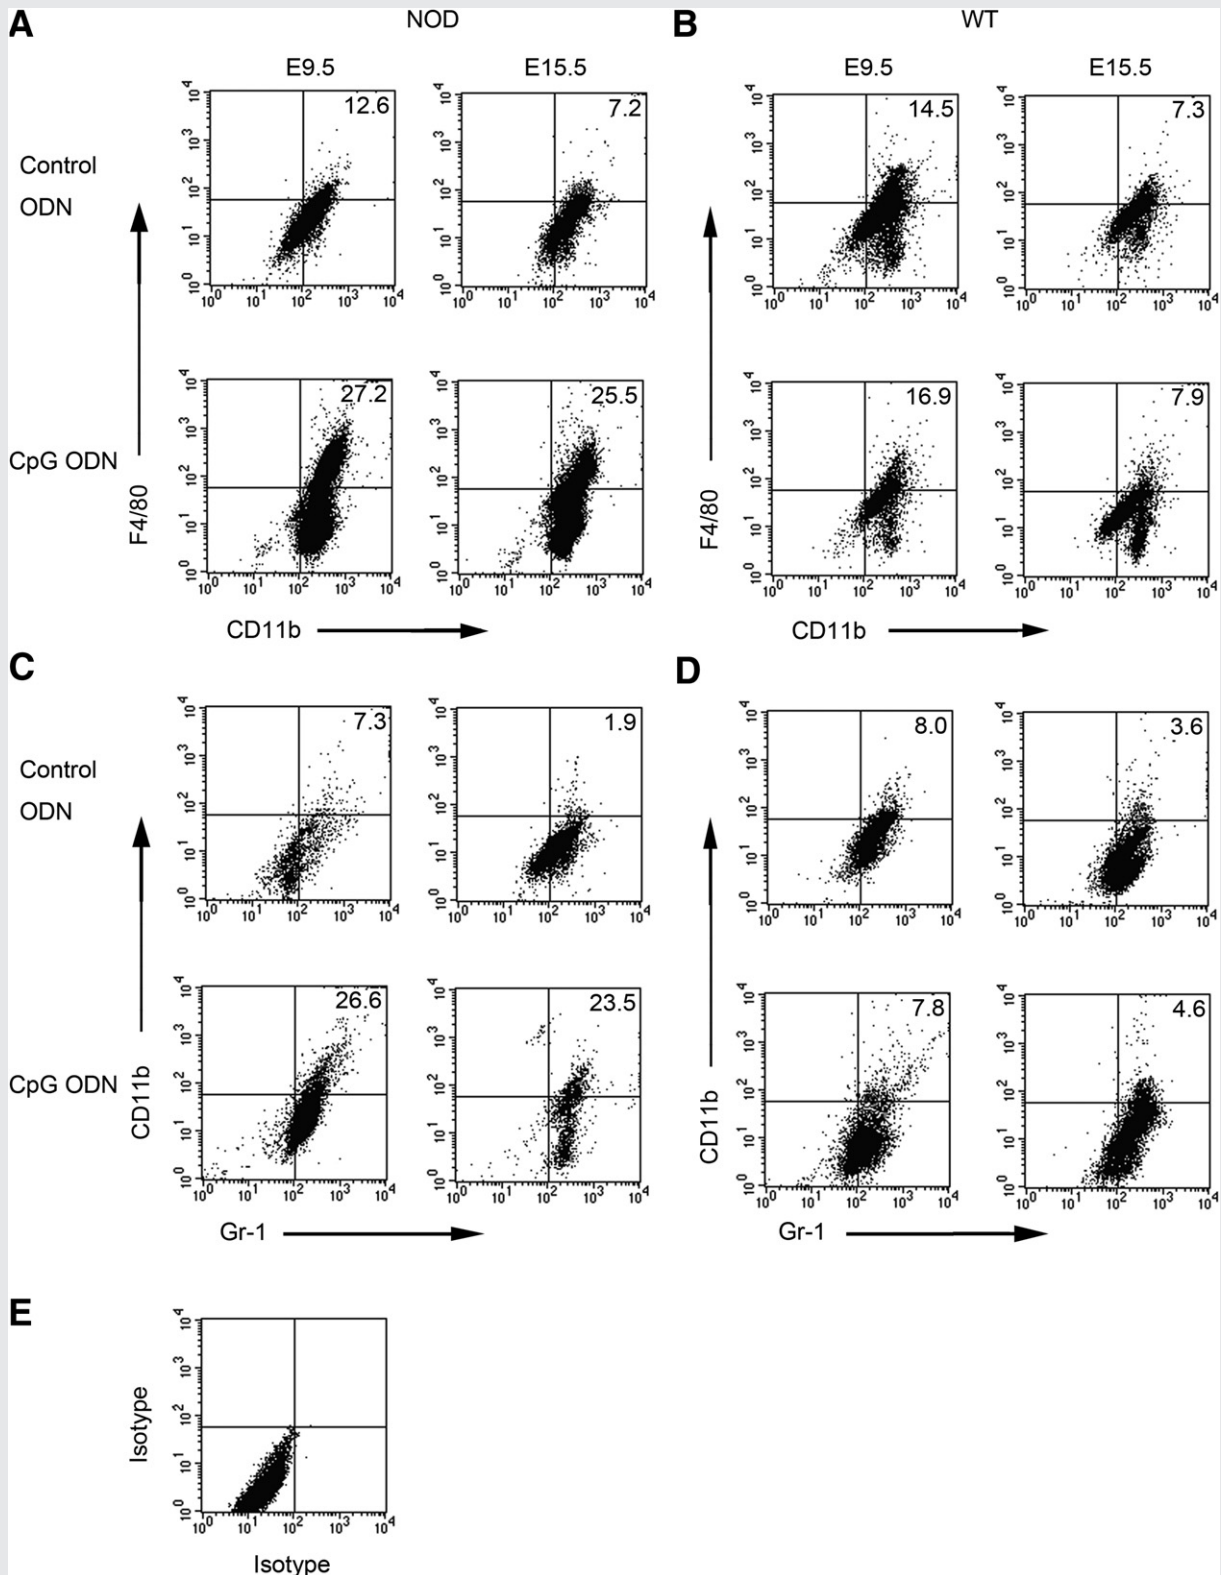

CD11b<sup>+</sup>F4/80<sup>+</sup> and CD11b<sup>+</sup>Gr-1<sup>+</sup> uterine cell populations amplify in response to CpG ODN in NOD but not in WT mice. Single-cell suspensions of UMGCs were obtained from NOD (A and C) or WT (B and D) mice at E9.5 or E15.5 after being treated with control or CpG ODN. Cells were gated for CD11b<sup>+</sup>F4/80<sup>+</sup> (A and B) and CD11b<sup>+</sup>Gr-1<sup>+</sup> in the CD45<sup>+</sup> subpopulation (C and D). A representative dot plot of the isotype controls was shown (E). The data shown are representative of experiments performed independently 4 times per condition.

*Sun. TLR9 signaling and pregnancy loss. Fertil Steril 2013.*
